# Supplementary material
Source: Springer Nature journal article supplement (https://www.springermedizin.de/resource/supplementary/13063_2010_530_MOESM3_ESM.pdf/9618174)
Supplement: MOESM3 [file 9618174]

**Educational  
strategy**

**No Educational  
strategy**

Screening strategy

No Screening  
strategy

Screening strategy

No Screening  
strategy

Environmental  
strategy

|   |   |
|---|---|
| A | B |
| C | D |

Environmental  
strategy

|   |   |
|---|---|
| E | F |
| G | H |

No Environmental  
strategy

No Environmental  
strategy

|   |   |
|---|---|
| C | D |
|---|---|

|   |   |
|---|---|
| G | H |
|---|---|
